# Supplementary material
Source: ML conference proceedings conference paper supplement (https://openreview.net/forum?id=XvOH0v2hsph)

cifar10-valid

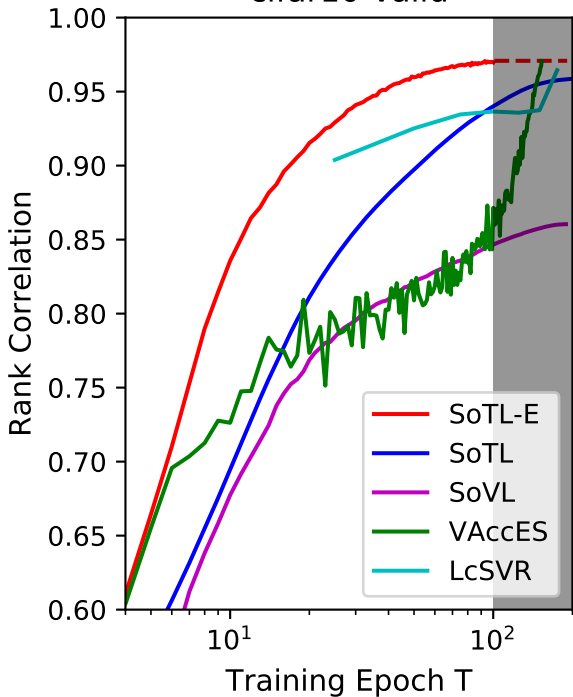

Supplement: supplementary_material [file attachment]

cifar100

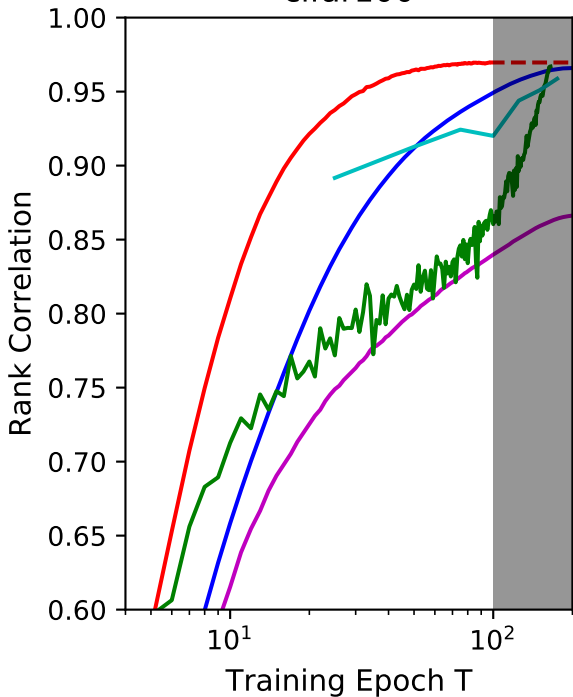

Supplement: supplementary_material [file attachment]

flowers102

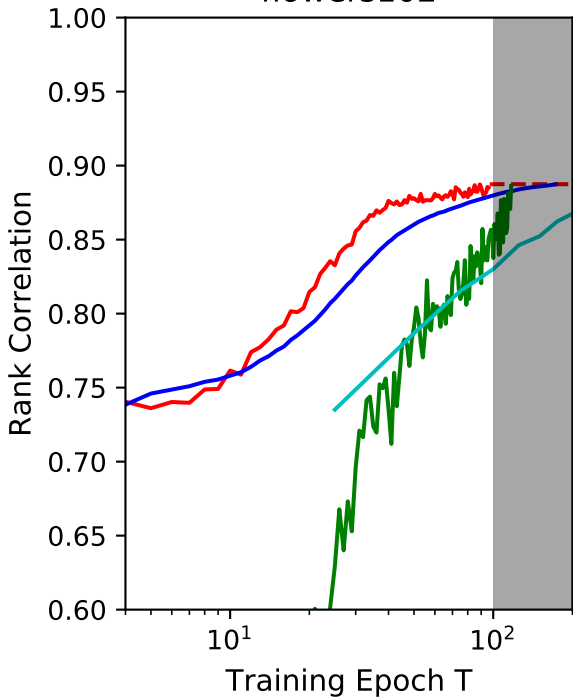

Supplement: supplementary_material [file attachment]
